# Supplementary material for: A Polylactide-Based Micellar Adjuvant Improves the Intensity and Quality of Immune Response
Source: MDPI journal article supplement (doi:10.3390/pharmaceutics14010107), 2022-01-03
Supplement: s1 [file s1]

Supplementary materials

# A Polylactide-Based Micellar Adjuvant Improves the Intensity and Quality of Immune Response

Myriam Lamrayah <sup>1,\*</sup>, Capucine Phelip <sup>1</sup>, Céline Coiffier <sup>1</sup>, Céline Lacroix <sup>1</sup>, Thibaut Willemin <sup>1</sup>, Thomas Trimaille <sup>2,\*</sup> and Bernard Verrier <sup>1</sup>

<sup>1</sup> Laboratoire de Biologie Tissulaire et Ingénierie Thérapeutique (LBTI), Institut de Biologie et Chimie des Protéines (IBCP), CNRS UMR 5305, Université Lyon 1, Université de Lyon, 69367 Lyon, France; capucine-phelip@gmail.com (C.P.); celine.coiffier@ibcp.fr (C.C.); celine.fish@free.fr (C.L.); thibaut.willemin@gmail.com (T.W.); bernard.verrier@ibcp.fr (B.V.)

<sup>2</sup> Laboratoire Ingénierie des Matériaux Polymères (IMP), CNRS UMR 5223, Université Lyon 1, Université de Lyon, 69622 Villeurbanne, France

\* Correspondence: myriam.lamrayah@ibcp.fr (M.L.); thomas.trimaille@univ-lyon1.fr (T.T.)

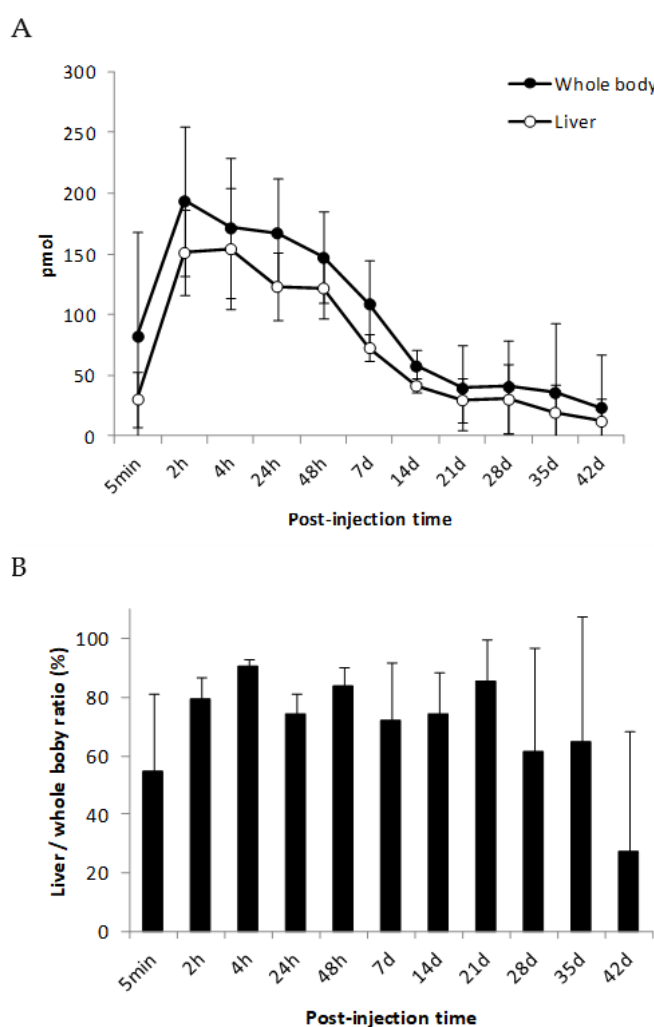

**Figure S1.** Distribution of DiR fluorescent micelles after their administration by intravenous route. (A) whole body and liver fluorescence vs. post-injection time; (B) liver to whole body fluorescence ratio vs. post-injection time.
